# Supplementary material for: Multidimensional Evaluation of the Potential Impact of Faricimab Availability on Healthcare System Accessibility for Retinal Disease Treatment in Poland
Source: Research Square preprint supplement (doi:10.21203/rs.3.rs-7299149/v1), 2025-08-17
Supplement: Supplementary file 1 [file b694d718b498c15cadc8dad8.docx]

**Supplementary file**

**Supplemental Figure S1. Projected patient numbers for 2025-2035**


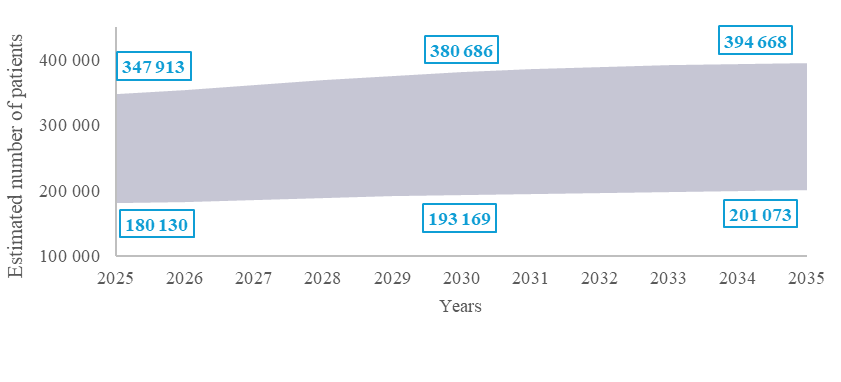


**13%**

**12%**

**nAMD and clinically significant DME with foveal involvement**

**2035 vs 2025**

*DME* diabetic macular edema; *nAMD* neovascular age-related macular degeneration.

**Supplemental Figure S2. Proportion of patients by waiting time for Drug Programme Treatment of Patients with Retinal Diseases (2019-2023*)**

*Data for 2020 has not been included as it has not been published.

**Supplemental Table S1. Number of individuals from the waiting list who received services in Drug Programme Treatment of Patients with Retinal Diseases – actual waiting times**

| **Year** | **Total** | **up to 1 month** | **1 to 2 months** | **2 to 3 months** | **3 to 6 months** | **6 to 12 months** | **12 to 24 months** | **above 24 months** |
| --- | --- | --- | --- | --- | --- | --- | --- | --- |
| 2019 | 1,646 | 1,239 | 251 | 75 | 62 | 10 | 8 | 1 |
| 2020 | 6,823 | 4,825 | 1,587 | 277 | 111 | 16 | 7 | 0 |
| 2021 | 7,584 | 5,759 | 1,368 | 254 | 164 | 35 | 4 | 0 |
| 2022 | 8,689 | 6,561 | 1,488 | 472 | 152 | 13 | 3 | 0 |
| 2023 | 1,646 | 1,239 | 251 | 75 | 62 | 10 | 8 | 1 |

**Supplemental Table S2. Number of individuals from the waiting list who received services in ophthalmology outpatient centre - actual waiting times**

| **Year** | **Total** | **up to 1 month** | **1 to 2 months** | **2 to 3 months** | **3 to 6 months** | **6 to 12 months** | **12 to 24 months** | **above 24 months** |
| --- | --- | --- | --- | --- | --- | --- | --- | --- |
| 2019 | 198,485 | 75,476 | 32,359 | 20,989 | 34,573 | 30,268 | 4,285 | 535 |
| 2020 | 213,015 | 107,805 | 29,061 | 18,113 | 26,837 | 24,060 | 6,517 | 622 |
| 2021 | 296,050 | 127,307 | 53,290 | 33,945 | 48,776 | 27,490 | 4,422 | 820 |
| 2022 | 330,259 | 129,261 | 54,703 | 33,087 | 60,330 | 44,982 | 7,405 | 491 |
| 2023 | 373,921 | 143,011 | 61,046 | 37,911 | 64,242 | 55,996 | 11,383 | 332 |
